# Supplementary material
Source: PubMed Central journal article supplement (PMC2666034)
Supplement: emboj200923s1.pdf [file emboj200923s1.pdf]

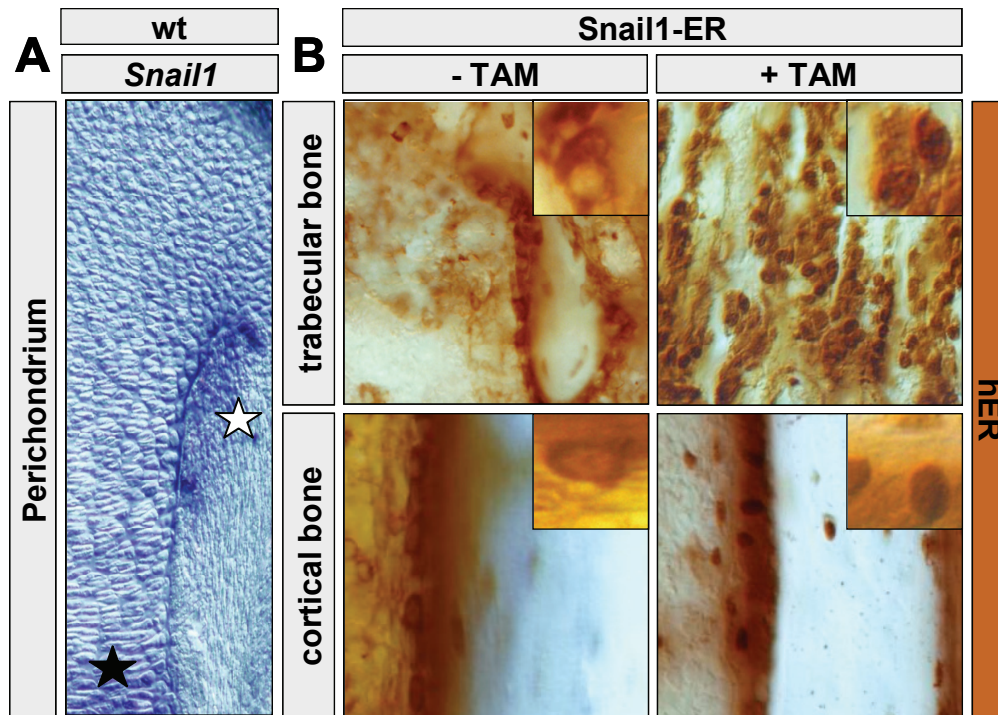

**Supplementary Fig. 1.** (A) Endogenous *Snail1* expression in the perichondrial area (white star) and in the growth plate (black star; see de Frutos et al., 2007) of the long bones. (B) Subcellular localization of Snail1-ER is regulated by Tamoxifen in transgenic bones. Immunostaining of the Snail1-ER protein in adult bones (12 week-old mice). Note the nuclear translocation after 4 weeks of tamoxifen administration, best assessed in the high power images inserted in each panel.

De Frutos, C.A., Vega, S., Manzanares, M., Flores, J.M., Huertas, H., Martinez-Frías, M.L. and Nieto M.A. (2007). *Snail1* is a transcriptional effector of FGFR3 signaling during chondrogenesis and achondroplasias. *Dev. Cell* 13, 872-883.

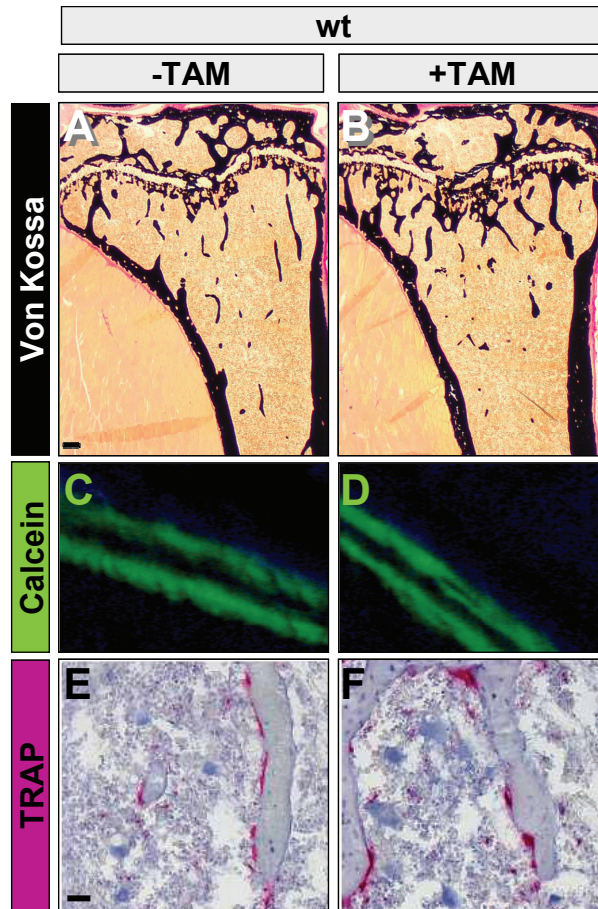

**Supplementary Fig. 2.** Bone mineralization, cortical thickness, osteoblasts activity and osteoclasts differentiation are not affected by Tamoxifen administration in wild type mice. (A-B) Von Kossa staining in sections of long bones from 16 week-old mice. (C-D) Osteoblasts activity measured by in vivo calcein incorporation into trabecular bone. (E, F) TRAP staining of osteoclasts. Scale bars, 1 mm (A, B) and 100  $\mu$ m (E, F).

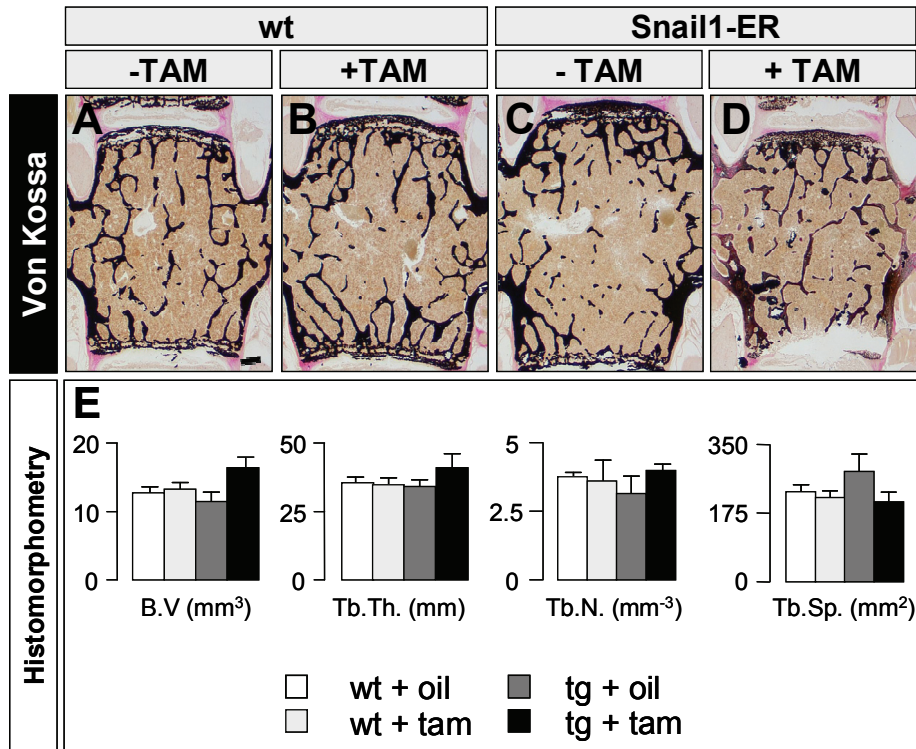

**Supplementary Fig. 3.** (A-D) Von Kossa staining of vertebrae sections from 16-week-old wild type and Snail1-ER mice (black staining). (E) Histomorphometric analysis (n=5 per condition). Bone volume (B.V.); Trabecular thicknes (Tb. Th.); trabeculae number (Tb.N.) and trabecular spacing (Tb. Sp.). Scale bar, 1mm.

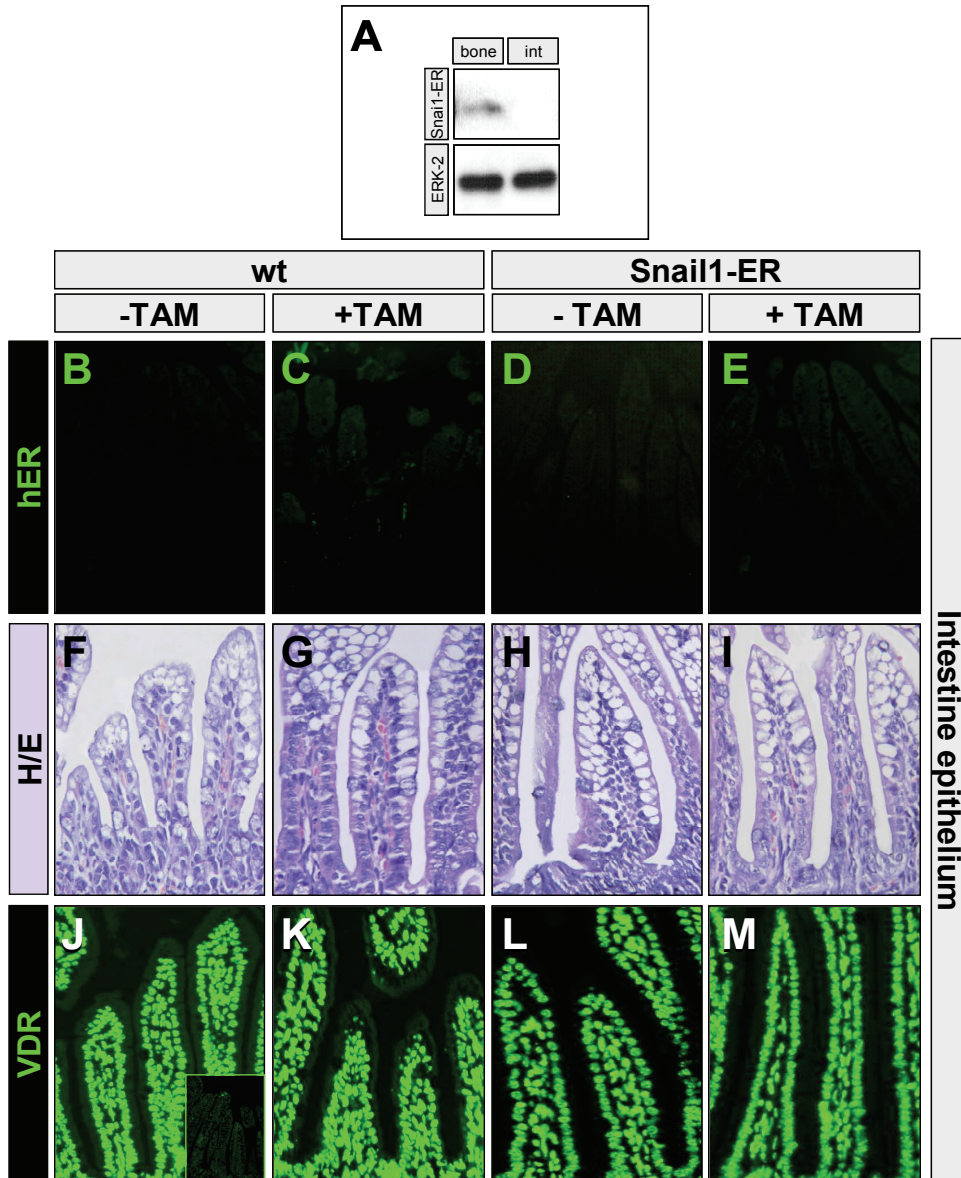

**Supplementary Fig. 4.** (A) Western blot and (B-E) immunohistochemical analysis confirms that no transgenic protein (hER) is present in the intestine. Thus, tamoxifen administration does not have any impact on tissue morphology (F-I) or VDR expression (J-M). The inset in (J) shows a negative control for the VDR antibody. Int, intestine

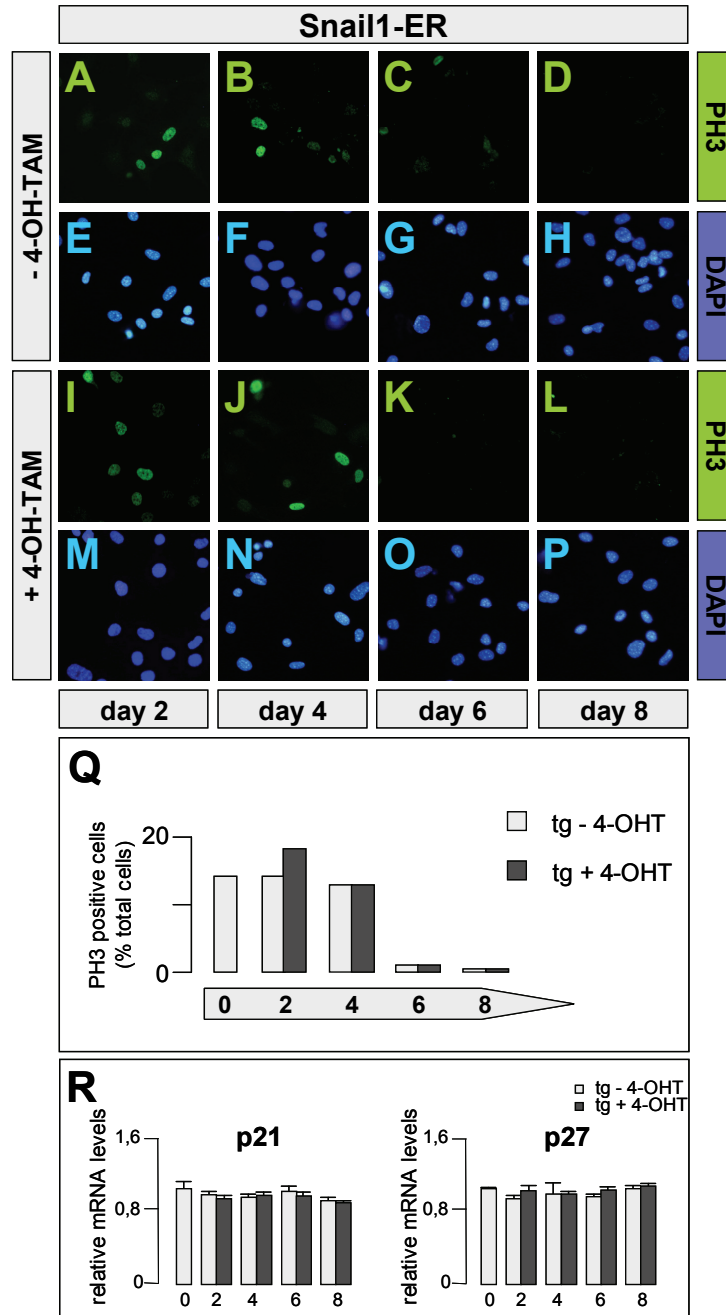

**Supplementary Fig. 5.** Snail1 activation does not affect the proliferation in osteoblasts in culture. (A-D and I-L) Phospho-histone 3 immunofluorescence (PH3) shows the mitotic transgenic osteoblasts during *in vitro* differentiation in the presence or in the absence of 4-OH-TAM. (E-H and M-P) Cells were counterstained with DAPI to reveal their nuclei. (Q) Quantification of PH3-positive cells. (R) Real time PCR shows no variations in the mRNA levels of p21 and p27, indicating that contrary to its action in chondrocytes, Snail1 does not activate p21 in osteoblasts.

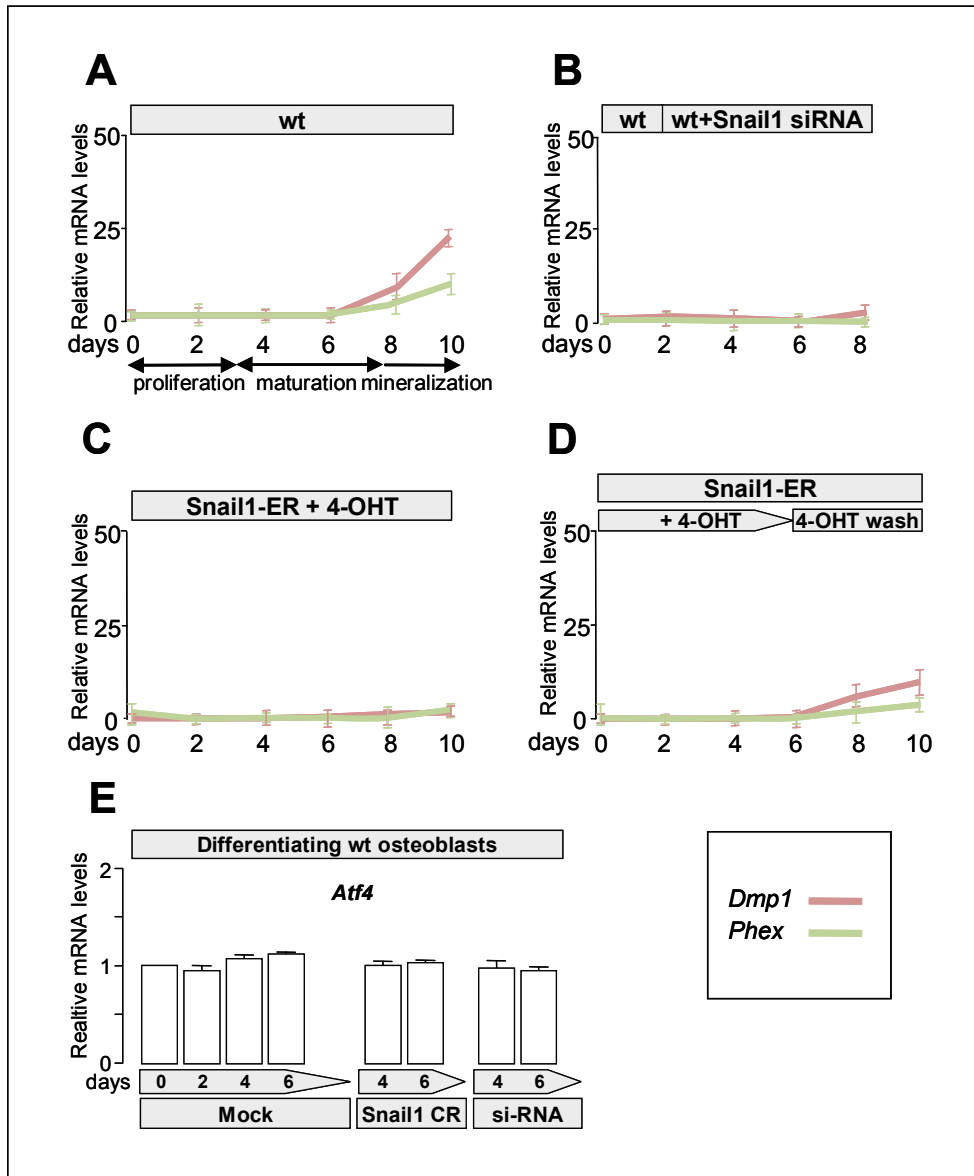

**Supplementary Fig. 6.** Snail1 is necessary for osteoblast differentiation in culture. (A, B) Relative mRNA levels of *Dmp1* and *Phex* in wild type and transgenic mesenchymal cells during their differentiation to osteoblasts. (C, D) Snail1 activation inhibits *Dmp1* and *Phex* expression in cultured osteoblasts. This effect is reversible, as assessed by the onset of their expression when 4-OHT is washed out. *Dmp1* (light brown) and *Phex* (light green). (E) the expression of *Atf4* is not affected by Snail1 activation.

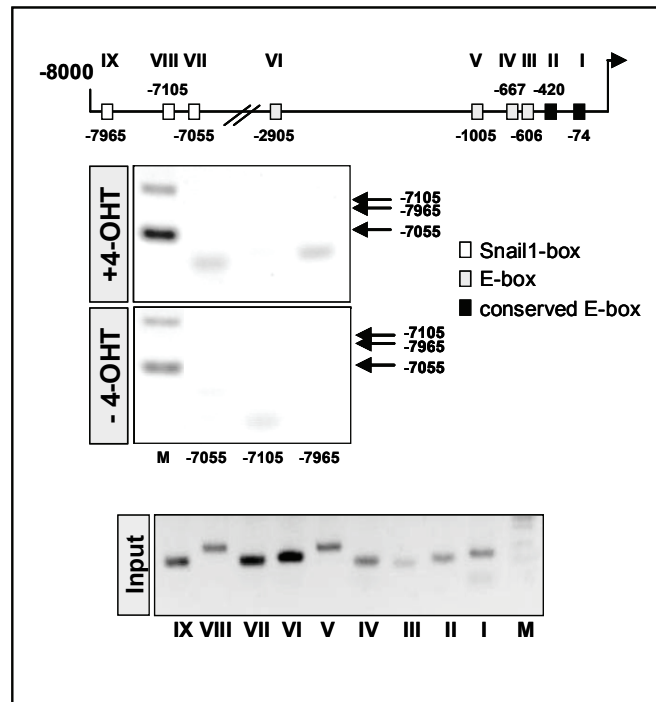

**Supplementary Fig. 7.** Snail1 does not bind to its perfect match E-boxes (GCAGGTG; Cano et al., 2000) located from 7 to 8Kb upstream of the *Runx2* gene coding region. These Snail1 E-boxes are not conserved in the human promoter. The arrows on the right indicate the positions of the predicted amplified fragments. Input material was tested for each primer set (boxes I to IX).

Cano, A., Pérez, M. A., Rodrigo, I., Locascio, A., Blanco, M. J., Del Barrio, M. G., Portillo, F. and Nieto, M. A. (2000). The transcription factor Snail controls epithelial-mesenchymal transitions by repressing E-cadherin expression. *Nature Cell Biol.* 2, 76-83

**Supplementray Table I. Oligonucleotides**

|                 | GENE                             | SEQUENCE (5' to 3')                                       | fragment size (bp) |
|-----------------|----------------------------------|-----------------------------------------------------------|--------------------|
| mice genotyping |                                  | ACGATAAGCTCGAGCCATCTGC<br>ACCGAGATGATGTAGCCAGCAG          | 450                |
| RT-PCR          | <i>Gapdh</i>                     | CAAAGTGGAGATTGTTGCCATC<br>CACCACCTTCTTGATGTCATC           | 709                |
|                 | <i>Snail 1</i>                   | AGCTGGCCAGGCTCTCGGTG<br>TAGCAGGGTCAGCGAGGGCC              | 391                |
| Q-RT-PCR        | <i>Alkaline Phosphatase</i>      | GAGAGGTCCAGGCAACTTCCA<br>GGAATAAAGGCAGACCAGGAAT           | 102                |
|                 | <i>Bglap1/Osteocalcin</i>        | GGCTGGAAGACCGCTACAAA<br>CCCGGAGAGCCAAAG                   | 100                |
|                 | <i>Cbfa1/Runx2</i>               | GGCCGGGAATGATGAGAACTAC<br>CGCTCCGGCCACAAAT                | 101                |
|                 | <i>Collagen1a1</i>               | GGAGAGAGCATGACCGATGGA<br>GGTGGACATTAGGCAGGAA              | 101                |
|                 | <i>Cyp27b1</i>                   | TACCTGAGCCAGGTGCTCTT<br>GGCTGTCTTCGAATGGTA                | 102                |
|                 | <i>Dmp1</i>                      | CCACAGACACCACCCGTCC<br>TGTCTGCCTCATCCTACTG                | 100                |
|                 | <i>Gapdh</i>                     | CTGAGCAAGAGAGGCCCTATCC<br>CTCCCTAGGCCCTCCTGTT             | 104                |
|                 | <i>Ibsp/Sialoprotein</i>         | ACCACACCCCAAGCACAGACT<br>TCGTGCTTTCCTTCACTTTTG            | 102                |
|                 | <i>p21</i>                       | AGGAGCCAGCCAAGATGGT<br>GCTTTGACACCCACGGTATTCA             | 100                |
|                 | <i>p27</i>                       | AGAACTAACCCGGGACTTGG<br>CCAGGGGCTTATGATTCTGA              | 102                |
|                 | <i>Phex</i>                      | GATTTCTGCTGGAGAGCTG<br>TGAAATTCATGGCCACAA                 | 100                |
|                 | <i>Tnfsf11/Rankl</i>             | CAACATTTGCTTTCGGCATCAT<br>AACTTGGGATTTGATGCTGGTTT         | 102                |
|                 | <i>Tnfrsf11b/Osteoprotegerin</i> | AAACACACGGACTGCAGCAT<br>CACTTTTGGTGGCTTCTCTGT             | 100                |
|                 | <i>Snail 1</i>                   | CCACACTGGTGAGAAGCCATTC<br>TCTTCACATCCGAGTGGTTTG           | 101                |
|                 | <i>Spp1/Osteopontin</i>          | TGATTTGCTTTTGCCTGTTTGG<br>AGGATCTGGTGCAGGCTGTA            | 102                |
|                 | <i>Vdr</i>                       | CAAGGACAACCGGCGACT<br>TTACGCTGCACCTCCTCATCTG              | 102                |
| ChIP assay      | <i>Runx2 E-box I</i>             | AAAGAGGGAGGGAAGAGAGCAA<br>CGAATGAAGCATTACACAATCC          | 150                |
|                 | <i>Runx2 E-box II</i>            | TGGCAGAAAGGAAAAGCCTTA<br>GCCTTCTGGCATTAGAA                | 126                |
|                 | <i>Runx2 E-box III</i>           | CTTGCAAGTGATACAATCCCAA<br>CCTCCTCCCTTTCCTTATTAT           | 103                |
|                 | <i>Runx2 E-box IV</i>            | CCAAGCTTAGGAAGACAAGCAA<br>TCAACTGAGTGTGGCGTT              | 105                |
|                 | <i>Runx2 E-box V</i>             | CGTGGCGGCTTTACAATAAA<br>TCACTGTCCACGCTGATGAAA             | 100                |
|                 | <i>Runx2 E-box VI</i>            | GCATTTGCTTACTATCCTATAGCAAC<br>CTGTGCCAGTGTGATCTTTATC      | 120                |
|                 | <i>Runx2 E-box VII</i>           | CATTCTAGAATGATCCAACCTAATGG<br>TTACAGGAATAGATTGGTTAGAATTAG | 104                |
|                 | <i>Runx2 E-box VIII</i>          | ATCTGCATGATTGGTTTGAAC<br>CCATTAAGTTCCATCATTCTAGAATG       | 112                |
|                 | <i>Runx2 E-box IX</i>            | CATGACTACAACCTATTCTTGCCTC<br>AGCCAGTAAATGAATACATGTGTCTG   | 100                |
|                 | <i>VDR E-box I</i>               | TAGGAGAGAGGACGCAACTCC<br>CGCTGCAGGGAGCCGTTCTCT            | 101                |
|                 | <i>VDR E-box II</i>              | TGGCAGAAAGGAAAAGCCTTA<br>AGAGAACGGCTCCCTGCAGCG            | 100                |
|                 | <i>VDR E-box III</i>             | GATCCGTGATGTAGCCACCAC<br>GTGCAGTGGTTGATTCCAAGT            | 100                |
